# Supplementary material for: Genome wide association analysis of cold tolerance at germination in temperate japonica rice (Oryza sativa L.) varieties
Source: PubMed Central journal article supplement (PMC5560564; doi:10.1371/journal.pone.0183416), 2017-08-17

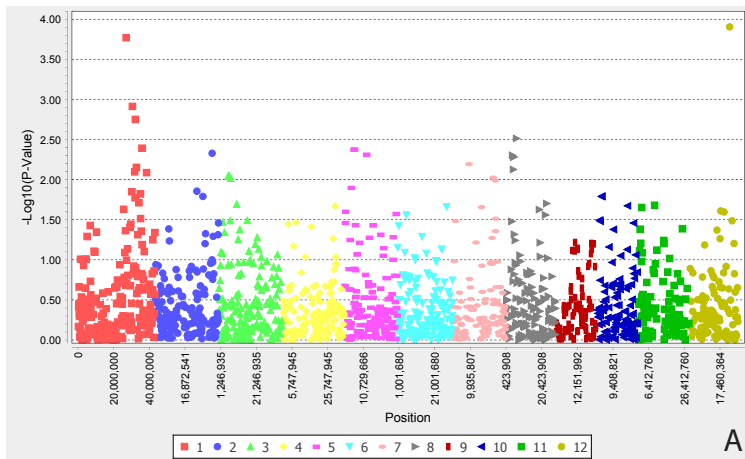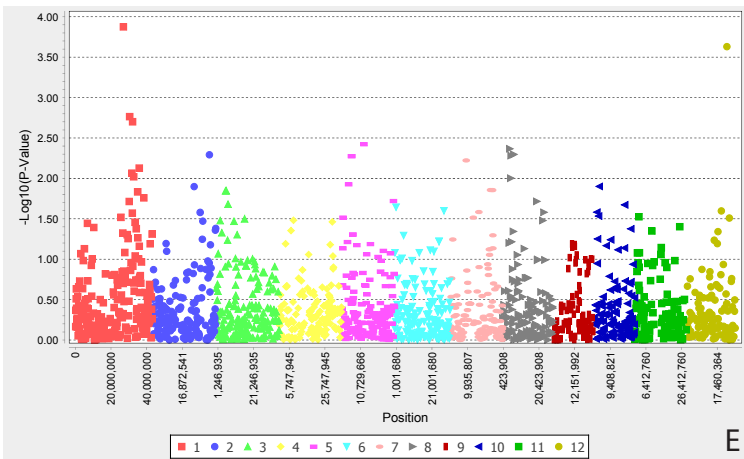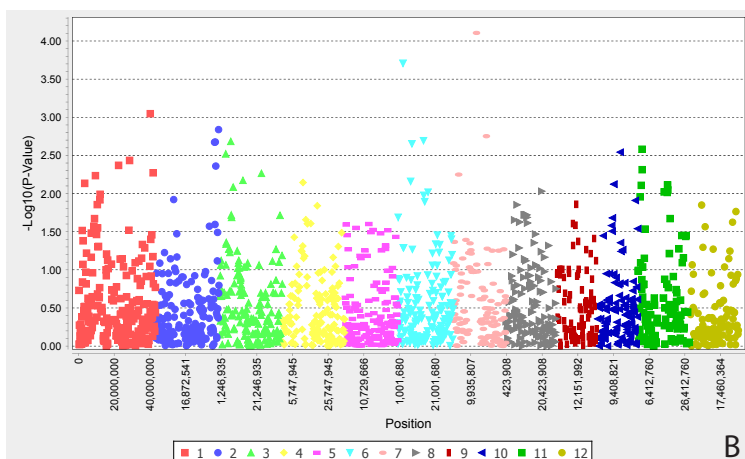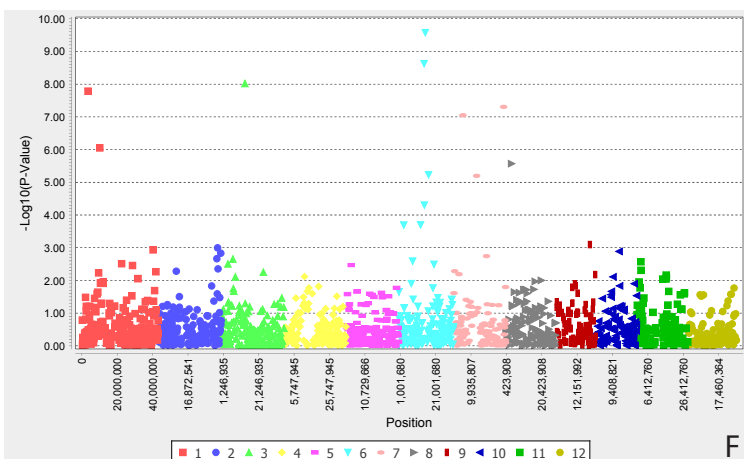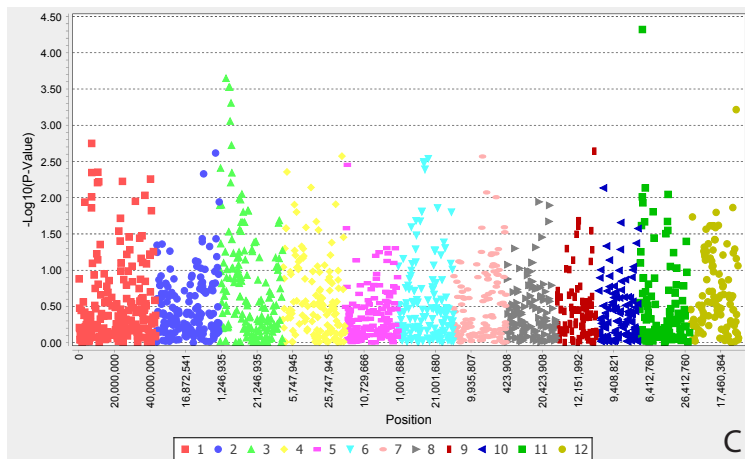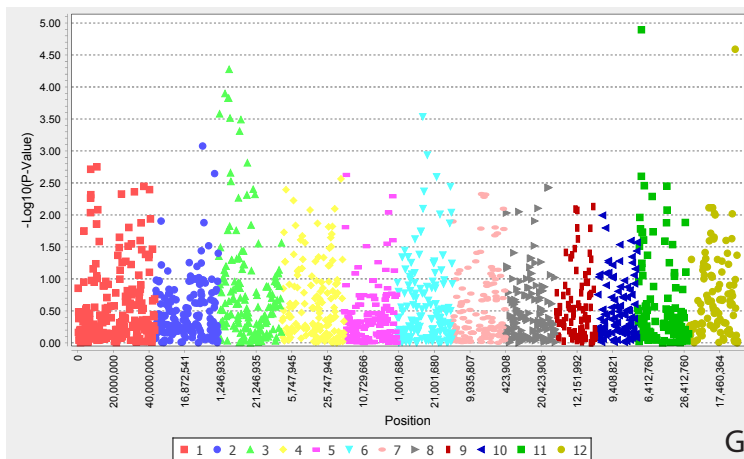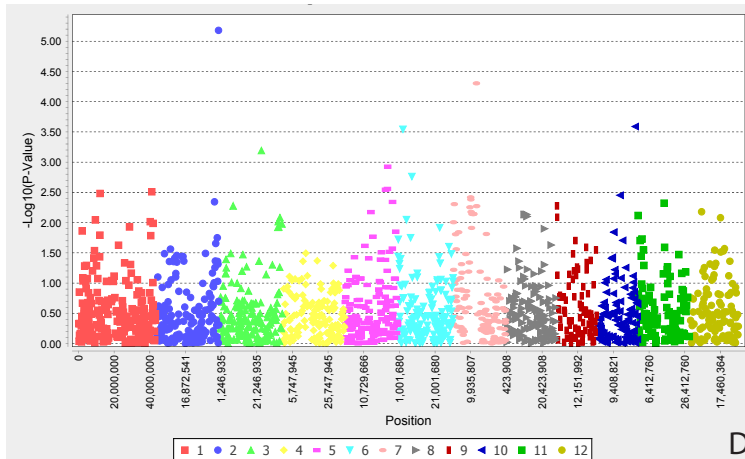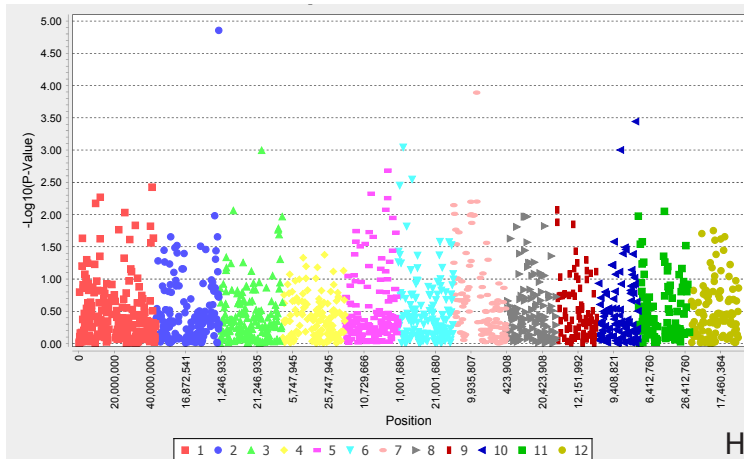

Supplement: pone.0183416.s001.pdf [file pone.0183416.s001.pdf]
